## **Addendum: ACSL4: biomarker, mediator and target in quadruple negative breast cancer**

**Marie E. Monaco**<sup>1,2</sup>

<sup>1</sup>Department of Neuroscience and Physiology, NYU Grossman School of Medicine, New York, NY 10016, USA

<sup>2</sup>VA NY Harbor Healthcare System, New York, NY 10010, USA

**Published:** August 10, 2023

**Copyright:** © 2023 Monaco. This is an open access article distributed under the terms of the [Creative Commons Attribution License](#) (CC BY 3.0), which permits unrestricted use, distribution, and reproduction in any medium, provided the original author and source are credited.

**This article has an addendum:** No external funding was obtained with respect to this publication.

Original article: Oncotarget. 2023; 14:563–575. <https://doi.org/10.18632/oncotarget.28453>
